# Supplementary material
Source: PubMed Central journal article supplement (PMC3356638)
Supplement: 1205850109_pnas.201205850SI.pdf [file 1205850109_pnas.201205850SI.pdf]

# Supporting Information

Ng et al. 10.1073/pnas.1205850109

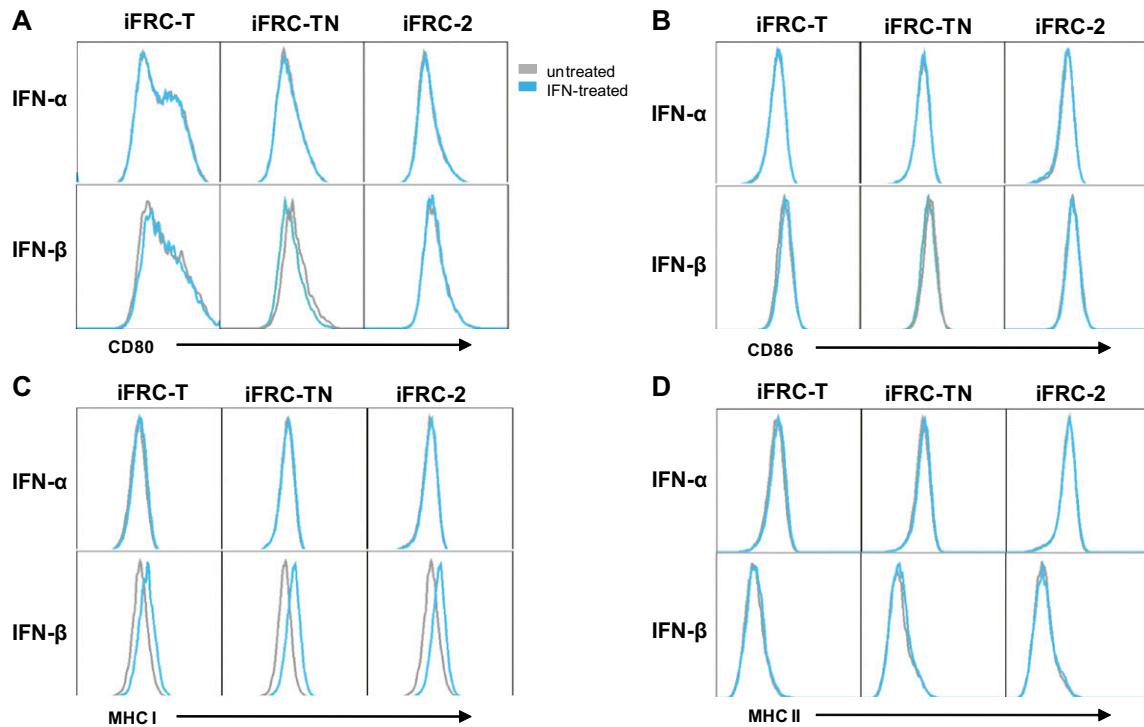

Fig. S1. iFRC expression of T-cell stimulatory ligands in the presence of type I IFN. iFRC expression of CD80 (A), CD86 (B), MHC I (C), and MHC II (D) in the presence and absence of IFN- $\alpha$  and IFN- $\beta$  as assessed by flow cytometry.

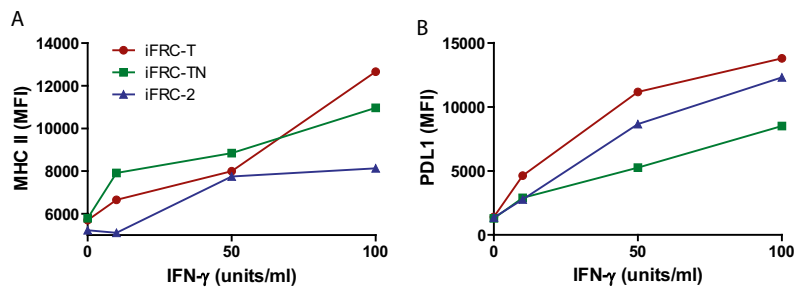

Fig. S2. MHC II and PD-L1 are up-regulated on iFRCs by IFN- $\gamma$  in a dose-dependent manner. iFRCs were incubated with 0, 10, 50, or 100 U/mL of IFN- $\gamma$  for 48 h and assessed for extracellular MHC II (A) and PD-L1 (B) by flow cytometry.

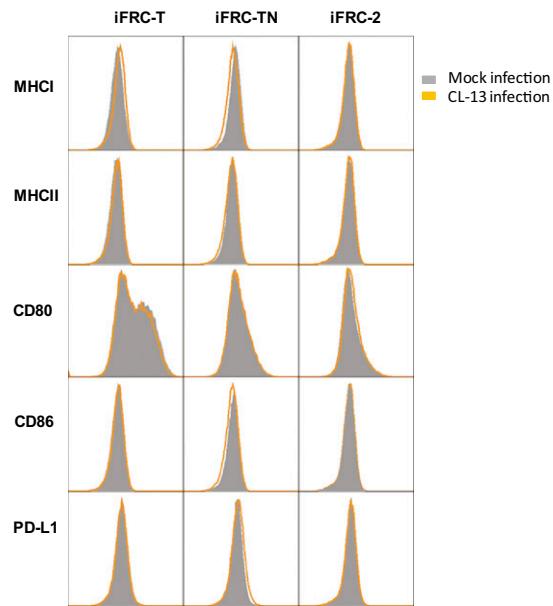

**Fig. S3.** CL-13 infection alone does not alter expression of T-cell stimulatory ligands on iFRCs. iFRCs were evaluated for changes in expression of T-cell ligands by flow cytometry 48 h after infection with CL-13 (MOI 1).

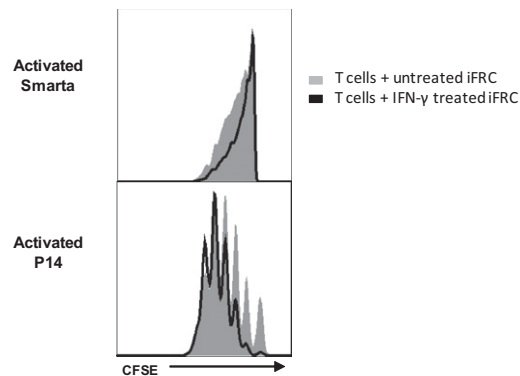

**Fig. S4.** IFN- $\gamma$  treatment does not alter iFRC-mediated stimulation of activated CD4+ Smarta and CD8+ P14 T cells. Activated Smarta and P14 cells were stained with carboxyfluorescein succinimidyl ester (CFSE) and incubated with either mock or IFN- $\gamma$ -treated iFRCs and LCMV peptide (GP<sub>61-80</sub> peptide for Smarta and GP<sub>33-41</sub> peptide for P14). IFN- $\gamma$  treatment of iFRCs did not reduce the number of T-cell proliferation cycles in comparison with mock-treated iFRCs; however, mock-treated iFRCs were likely exposed to IFN- $\gamma$  produced by the activated T cells.
